# Supplementary material for: A data-driven evaluation of the size and content of expanded carrier screening panels
Source: PubMed Central journal article supplement (PMC6752311; doi:10.1038/s41436-019-0466-5), 2019-02-28
Supplement: 41436_2019_466_MOESM5_ESM.pdf [file 41436_2019_466_MOESM5_ESM.pdf]

Table S4: Clinical detection rate estimates when three reported cases are assumed to determine pathogenicity

|                                                                 |             |             |             |             |          |
|-----------------------------------------------------------------|-------------|-------------|-------------|-------------|----------|
| mucopolidiosis III gamma                                        | 0.000825854 | 0.918775848 | 0.940973005 | 0.976253854 | AR       |
| cystinosis                                                      | 0.003213236 | 0.986112403 | 0.994610496 | 0.994610496 | AR       |
| USH1C-related disorders                                         | 0.001238128 | 0.984897778 | 0.987987526 | 0.988911562 | AR       |
| Bardet-Biedl syndrome, BBS1-related                             | 0.005366863 | 0.994017167 | 0.996999491 | 0.997338942 | AR       |
| methylmalonic aciduria and homocystinuria, cblC type            | 0.005109334 | 0.9868441   | 0.99251869  | 0.994947353 | AR       |
| MYO7A-related disorders                                         | 0.004913812 | 0.99028436  | 0.991007328 | 0.991468491 | AR       |
| Sandhoff disease                                                | 0.003027014 | 0.891414169 | 0.941852266 | 0.967288283 | AR       |
| calpainopathy                                                   | 0.005494707 | 0.991580744 | 0.992730011 | 0.993702971 | AR       |
| citrullinemia type 1                                            | 0.002025232 | 0.988918901 | 0.991187791 | 0.992869201 | AR       |
| Herlitz junctional epidermolysis bullosa, LAMC2-related         | 0.000774403 | 0.958513354 | 0.966516104 | 0.972751375 | AR       |
| GLDC-related glycine encephalopathy                             | 0.001550012 | 0.983351283 | 0.986042383 | 0.988638633 | AR       |
| TGM1-related autosomal recessive congenital ichthyosis          | 0.003392383 | 0.978785056 | 0.985931367 | 0.9879366   | AR       |
| Pompe disease                                                   | 0.011149681 | 0.991230702 | 0.992776217 | 0.993624492 | AR       |
| pycnodysostosis                                                 | 0.000520649 | 0.954134315 | 0.983670856 | 0.987032738 | AR       |
| ATP7A-related disorders                                         | 4.19E-05    | 0.5         | 0.5         | 0.5         | X-linked |
| MKS1-related disorders                                          | 0.001919276 | 0.990192331 | 0.992930947 | 0.994522768 | AR       |
| HMG-CoA lyase deficiency                                        | 0.000682821 | 0.877831282 | 0.877831282 | 0.877831282 | AR       |
| autosomal recessive osteopetrosis type 1                        | 0.001821932 | 0.958835151 | 0.97716447  | 0.983274243 | AR       |
| dystrophinopathy (including Duchenne/Becker muscular dystrophy) | 0.001121475 | 0.984745701 | 0.984745701 | 0.984745701 | X-linked |
| ABCC8-related hyperinsulinism                                   | 0.002113378 | 0.986292993 | 0.987815994 | 0.987815994 | AR       |
| FKTN-related disorders                                          | 0.00120112  | 0.978155047 | 0.984095236 | 0.988432899 | AR       |
| X-linked juvenile retinoschisis                                 | 0.000121159 | 0.971084337 | 0.971084337 | 0.971084337 | X-linked |
| biotinidase deficiency                                          | 0.004250571 | 0.994413788 | 0.994890176 | 0.995718183 | AR       |
| phenylalanine hydroxylase deficiency                            | 0.019605948 | 0.996215078 | 0.996562259 | 0.99629472  | AR       |
| primary carnitine deficiency                                    | 0.004346014 | 0.989641109 | 0.992825986 | 0.993787085 | AR       |
| Northern epilepsy                                               | 0.000221691 | 0.953613281 | 0.953613281 | 0.97265625  | AR       |
| Canavan disease                                                 | 0.001657308 | 0.974583656 | 0.986482128 | 0.992760734 | AR       |
| CLNS-related neuronal ceroid lipofuscinosis                     | 0.000462236 | 0.979245841 | 0.981430489 | 0.98689211  | AR       |
| ataxia-telangiectasia                                           | 0.00317273  | 0.974115307 | 0.971710152 | 0.979878141 | AR       |
| isovaleric acidemia                                             | 0.001163564 | 0.912493563 | 0.950096145 | 0.964440802 | AR       |
| lipoid congenital adrenal hyperplasia                           | 0.00077269  | 0.958863817 | 0.97819912  | 0.98546608  | AR       |
| Segawa syndrome                                                 | 0.000669426 | 0.978944974 | 0.981430637 | 0.986889347 | AR       |
| methylmalonic acidemia, cblB type                               | 0.00124321  | 0.981199272 | 0.990083132 | 0.992680407 | AR       |
| short chain acyl-CoA dehydrogenase deficiency                   | 0.00547958  | 0.978050189 | 0.986691153 | 0.990683807 | AR       |
| PCCA-related propionic acidemia                                 | 0.001385767 | 0.965719195 | 0.973178368 | 0.97721772  | AR       |
| Krabbe disease                                                  | 0.003769327 | 0.98693271  | 0.989920793 | 0.990964393 | AR       |
| congenital disorder of glycosylation type Ia                    | 0.010637004 | 0.990220257 | 0.994084936 | 0.996720234 | AR       |
| congenital disorder of glycosylation type Ic                    | 0.002506459 | 0.888725178 | 0.930678671 | 0.948962165 | AR       |
| congenital disorder of glycosylation type Ib                    | 0.000705713 | 0.963343838 | 0.983745231 | 0.983745231 | AR       |
| pyruvate carboxylase deficiency                                 | 0.00208462  | 0.960703353 | 0.960703353 | 0.972663202 | AR       |
| methylmalonic acidemia, cblA type                               | 0.00157035  | 0.755757392 | 0.844860784 | 0.931772694 | AR       |
| lysosomal acid lipase deficiency                                | 0.002782208 | 0.975410295 | 0.988129554 | 0.993183649 | AR       |
| Nijmegen breakage syndrome                                      | 0.002101899 | 0.988480093 | 0.990261358 | 0.991857075 | AR       |
| ataxia with vitamin E deficiency                                | 0.000935746 | 0.942241501 | 0.9654392   | 0.968315338 | AR       |
| PKHD1-related autosomal recessive polycystic kidney disease     | 0.00806609  | 0.981805607 | 0.985761433 | 0.987998707 | AR       |
| LAMA2-related muscular dystrophy                                | 0.004340333 | 0.960097421 | 0.971511168 | 0.979602149 | AR       |
| primary hyperoxaluria type 3                                    | 0.005121511 | 0.985550698 | 0.98879981  | 0.991599857 | AR       |
| primary hyperoxaluria type 2                                    | 0.001398061 | 0.9886333   | 0.990079997 | 0.992559998 | AR       |
| primary hyperoxaluria type 1                                    | 0.003516707 | 0.992770136 | 0.994322113 | 0.995388502 | AR       |
| Gaucher disease                                                 | 0.007484444 | 0.998170601 | 0.998475501 | 0.998475501 | AR       |
| Bloom syndrome                                                  | 0.00276864  | 0.899458728 | 0.929639007 | 0.947343839 | AR       |
| Salla disease                                                   | 0.00183288  | 0.961511904 | 0.979875708 | 0.991110475 | AR       |
| Joubert syndrome 2                                              | 0.000506866 | 0.986299904 | 0.989724928 | 0.989724928 | AR       |
| mucopolysaccharidosis type IIIB                                 | 0.00197876  | 0.963771558 | 0.979887646 | 0.986291498 | AR       |
| mucopolysaccharidosis type IIIC                                 | 0.001020071 | 0.948068772 | 0.965515299 | 0.973245843 | AR       |
| TPP1-related neuronal ceroid lipofuscinosis                     | 0.002419113 | 0.99431916  | 0.99431916  | 0.99586848  | AR       |
| mucopolysaccharidosis type IIIA                                 | 0.003227229 | 0.992318061 | 0.993626657 | 0.995153351 | AR       |
| peroxisome biogenesis disorder type 3                           | 0.001148436 | 0.988913833 | 0.990465896 | 0.992904853 | AR       |
| PCDH15-related disorders                                        | 0.001645422 | 0.983459533 | 0.984330084 | 0.984330084 | AR       |
| peroxisome biogenesis disorder type 6                           | 0.000598462 | 0.965782743 | 0.973064676 | 0.977449496 | AR       |
| peroxisome biogenesis disorder type 4                           | 0.000949901 | 0.982058736 | 0.982058736 | 0.985191338 | AR       |
| peroxisome biogenesis disorder type 5                           | 0.000275476 | 0.984682888 | 0.984682888 | 0.988512166 | AR       |
| inclusion body myopathy 2                                       | 0.001667789 | 0.986853379 | 0.99020515  | 0.992103802 | AR       |
| cerebrotendinous xanthomatosis                                  | 0.002986308 | 0.90518436  | 0.939074175 | 0.962318121 | AR       |
