# Supplementary material for: A data-driven evaluation of the size and content of expanded carrier screening panels
Source: Genet Med. 2019 Feb 28;21(9):1931–9. doi: 10.1038/s41436-019-0466-5 (PMC6752311; doi:10.1038/s41436-019-0466-5)
Supplement: Supplementary file 3 — Supplementary TableS2 [file 41436_2019_466_MOESM3_ESM.pdf]

**Table S2: Six ACOG criteria classification of a 176-condition panel**

| Disease name                                                 | Has a well-defined phenotype | Detrimental effect on quality of life in most affected individuals | May cause cognitive or physical impairment | Typically requires medical or surgical intervention | Often has childhood onset | Prenatal diagnosis is available |
|--------------------------------------------------------------|------------------------------|--------------------------------------------------------------------|--------------------------------------------|-----------------------------------------------------|---------------------------|---------------------------------|
| 11-beta-hydroxylase-deficient congenital adrenal hyperplasia | X                            | X                                                                  | X                                          | X                                                   | X                         | X                               |
| congenital adrenal hyperplasia                               | X                            | X                                                                  | X                                          | X                                                   | X                         | X                               |
| 6-pyruvoyl-tetrahydropterin synthase deficiency              | X                            | X                                                                  | X                                          | X                                                   | X                         | X                               |
| ABCC8-related hyperinsulinism                                | X                            | X                                                                  | X                                          | X                                                   | X                         | X                               |
| AMT-related glycine encephalopathy                           | X                            | X                                                                  | X                                          | X                                                   | X                         | X                               |
| ARSACS                                                       | X                            | X                                                                  | X                                          | X                                                   | X                         | X                               |
| ATP7A-related disorders                                      | X                            | X                                                                  | X                                          | X                                                   | X                         | X                               |
| Alstrom syndrome                                             | X                            | X                                                                  | X                                          | X                                                   | X                         | X                               |
| Andermann syndrome                                           | X                            | X                                                                  | X                                          | X                                                   | X                         | X                               |
| Bardet-Biedl syndrome, BBS1-related                          | X                            | X                                                                  | X                                          | X                                                   | X                         | X                               |
| Bardet-Biedl syndrome, BBS10-related                         | X                            | X                                                                  | X                                          | X                                                   | X                         | X                               |
| Bardet-Biedl syndrome, BBS12-related                         | X                            | X                                                                  | X                                          | X                                                   | X                         | X                               |
| Bardet-Biedl syndrome, BBS2-related                          | X                            | X                                                                  | X                                          | X                                                   | X                         | X                               |
| Bloom syndrome                                               | X                            | X                                                                  | X                                          | X                                                   | X                         | X                               |
| CLN3-related neuronal ceroid lipofuscinosis                  | X                            | X                                                                  | X                                          | X                                                   | X                         | X                               |
| CLN5-related neuronal ceroid lipofuscinosis                  | X                            | X                                                                  | X                                          | X                                                   | X                         | X                               |
| CLN6-related neuronal ceroid lipofuscinosis                  | X                            | X                                                                  | X                                          | X                                                   | X                         | X                               |
| COL4A3-related Alport syndrome                               | X                            | X                                                                  | X                                          | X                                                   | X                         | X                               |
| COL4A4-related Alport syndrome                               | X                            | X                                                                  | X                                          | X                                                   | X                         | X                               |
| Canavan disease                                              | X                            | X                                                                  | X                                          | X                                                   | X                         | X                               |
| Cohen syndrome                                               | X                            | X                                                                  | X                                          | X                                                   | X                         | X                               |
| Costeff optic atrophy syndrome                               | X                            | X                                                                  | X                                          | X                                                   | X                         | X                               |
| D-bifunctional protein deficiency                            | X                            | X                                                                  | X                                          | X                                                   | X                         | X                               |
| ERCC6-related disorders                                      | X                            | X                                                                  | X                                          | X                                                   | X                         | X                               |
| ERCC8-related disorders                                      | X                            | X                                                                  | X                                          | X                                                   | X                         | X                               |
| EVC-related Ellis-van Creveld syndrome                       | X                            | X                                                                  | X                                          | X                                                   | X                         | X                               |
| EVC2-related Ellis-van Creveld syndrome                      | X                            | X                                                                  | X                                          | X                                                   | X                         | X                               |
| FKRP-related disorders                                       | X                            | X                                                                  | X                                          | X                                                   | X                         | X                               |
| FKTN-related disorders                                       | X                            | X                                                                  | X                                          | X                                                   | X                         | X                               |
| Fabry disease                                                | X                            | X                                                                  | X                                          | X                                                   | X                         | X                               |
| Fanconi anemia complementation group A                       | X                            | X                                                                  | X                                          | X                                                   | X                         | X                               |
| Fanconi anemia type C                                        | X                            | X                                                                  | X                                          | X                                                   | X                         | X                               |
| GJB2-related DFNB1 nonsyndromic hearing loss and deafness    | X                            | X                                                                  | X                                          | X                                                   | X                         | X                               |
| GLB1-related disorders                                       | X                            | X                                                                  | X                                          | X                                                   | X                         | X                               |
| GLDC-related glycine encephalopathy                          | X                            | X                                                                  | X                                          | X                                                   | X                         | X                               |
| GNPTAB-related disorders                                     | X                            | X                                                                  | X                                          | X                                                   | X                         | X                               |
| GRACILE syndrome                                             | X                            | X                                                                  | X                                          | X                                                   | X                         | X                               |
| Gaucher disease                                              | X                            | X                                                                  | X                                          | X                                                   | X                         | X                               |
| HADHA-related disorders                                      | X                            | X                                                                  | X                                          | X                                                   | X                         | X                               |
| HMG-CoA lyase deficiency                                     | X                            | X                                                                  | X                                          | X                                                   | X                         | X                               |
| Hb beta chain-related hemoglobinopathy                       | X                            | X                                                                  | X                                          | X                                                   | X                         | X                               |
| Herlitz junctional epidermolysis bullosa, LAMA3-related      | X                            | X                                                                  | X                                          | X                                                   | X                         | X                               |
| Herlitz junctional epidermolysis bullosa, LAMB3-related      | X                            | X                                                                  | X                                          | X                                                   | X                         | X                               |
| Herlitz junctional epidermolysis bullosa, LAMC2-related      | X                            | X                                                                  | X                                          | X                                                   | X                         | X                               |
| Joubert syndrome 2                                           | X                            | X                                                                  | X                                          | X                                                   | X                         | X                               |
| KCNJ11-related familial hyperinsulinism                      | X                            | X                                                                  | X                                          | X                                                   | X                         | X                               |
| Krabbe disease                                               | X                            | X                                                                  | X                                          | X                                                   | X                         | X                               |
| LAMA2-related muscular dystrophy                             | X                            | X                                                                  | X                                          | X                                                   | X                         | X                               |
| Leigh syndrome, French-Canadian type                         | X                            | X                                                                  | X                                          | X                                                   | X                         | X                               |
| MKS1-related disorders                                       | X                            | X                                                                  | X                                          | X                                                   | X                         | X                               |
| MUT-related methylmalonic acidemia                           | X                            | X                                                                  | X                                          | X                                                   | X                         | X                               |

Table S2: Six ACOG criteria classification of a 176-condition panel

|                                                             |   |   |   |   |   |   |
|-------------------------------------------------------------|---|---|---|---|---|---|
| MYO7A-related disorders                                     | X | X | X | X | X | X |
| NEB-related nemaline myopathy                               | X | X | X | X | X | X |
| Niemann-Pick disease type C                                 | X | X | X | X | X | X |
| Niemann-Pick disease type C2                                | X | X | X | X | X | X |
| Niemann-Pick disease, SMPD1-associated                      | X | X | X | X | X | X |
| Nijmegen breakage syndrome                                  | X | X | X | X | X | X |
| Northern epilepsy                                           | X | X | X | X | X | X |
| PCCA-related propionic acidemia                             | X | X | X | X | X | X |
| PCCB-related propionic acidemia                             | X | X | X | X | X | X |
| PCDH15-related disorders                                    | X | X | X | X | X | X |
| PEX1-related Zellweger syndrome spectrum                    | X | X | X | X | X | X |
| PKHD1-related autosomal recessive polycystic kidney disease | X | X | X | X | X | X |
| PPT1-related neuronal ceroid lipofuscinosis                 | X | X | X | X | X | X |
| PROP1-related combined pituitary hormone deficiency         | X | X | X | X | X | X |
| Pendred syndrome                                            | X | X | X | X | X | X |
| Pompe disease                                               | X | X | X | X | X | X |
| RTEL1-related disorders                                     | X | X | X | X | X | X |
| Salla disease                                               | X | X | X | X | X | X |
| Sandhoff disease                                            | X | X | X | X | X | X |
| Segawa syndrome                                             | X | X | X | X | X | X |
| Sjogren-Larsson syndrome                                    | X | X | X | X | X | X |
| Smith-Lemli-Opitz syndrome                                  | X | X | X | X | X | X |
| TGM1-related autosomal recessive congenital ichthyosis      | X | X | X | X | X | X |
| TPP1-related neuronal ceroid lipofuscinosis                 | X | X | X | X | X | X |
| USH1C-related disorders                                     | X | X | X | X | X | X |
| USH2A-related disorders                                     | X | X | X | X | X | X |
| Usher syndrome type 3                                       | X | X | X | X | X | X |
| Wilson disease                                              | X | X | X | X | X | X |
| X-linked Alport syndrome                                    | X | X | X | X | X | X |
| X-linked adrenoleukodystrophy                               | X | X | X | X | X | X |
| X-linked congenital adrenal hypoplasia                      | X | X | X | X | X | X |
| X-linked juvenile retinoschisis                             | X | X | X | X | X | X |
| X-linked myotubular myopathy                                | X | X | X | X | X | X |
| X-linked severe combined immunodeficiency                   | X | X | X | X | X | X |
| adenosine deaminase deficiency                              | X | X | X | X | X | X |
| alpha thalassemia                                           | X | X | X | X | X | X |
| alpha-mannosidosis                                          | X | X | X | X | X | X |
| alpha-sarcoglycanopathy                                     | X | X | X | X | X | X |
| argininemia                                                 | X | X | X | X | X | X |
| argininosuccinic aciduria                                   | X | X | X | X | X | X |
| aspartylglycosaminuria                                      | X | X | X | X | X | X |
| ataxia with vitamin E deficiency                            | X | X | X | X | X | X |
| ataxia-telangiectasia                                       | X | X | X | X | X | X |
| autosomal recessive osteopetrosis type 1                    | X | X | X | X | X | X |
| beta-sarcoglycanopathy                                      | X | X | X | X | X | X |
| biotinidase deficiency                                      | X | X | X | X | X | X |
| calpainopathy                                               | X | X | X | X | X | X |
| carbamoylphosphate synthetase I deficiency                  | X | X | X | X | X | X |
| carnitine palmitoyltransferase IA deficiency                | X | X | X | X | X | X |
| carnitine palmitoyltransferase II deficiency                | X | X | X | X | X | X |
| cartilage-hair hypoplasia                                   | X | X | X | X | X | X |
| cerebrotendinous xanthomatosis                              | X | X | X | X | X | X |
| citrullinemia type 1                                        | X | X | X | X | X | X |
| congenital Finnish nephrosis                                | X | X | X | X | X | X |
| congenital disorder of glycosylation type Ia                | X | X | X | X | X | X |
| congenital disorder of glycosylation type Ib                | X | X | X | X | X | X |
| congenital disorder of glycosylation type Ic                | X | X | X | X | X | X |

Table S2: Six ACOG criteria classification of a 176-condition panel

|                                                                 |   |   |   |   |   |   |
|-----------------------------------------------------------------|---|---|---|---|---|---|
| cystic fibrosis                                                 | X | X | X | X | X | X |
| cystinosis                                                      | X | X | X | X | X | X |
| delta-sarcoglycanopathy                                         | X | X | X | X | X | X |
| dysferlinopathy                                                 | X | X | X | X |   | X |
| dystrophinopathy (including Duchenne/Becker muscular dystrophy) | X | X | X | X | X | X |
| familial Mediterranean fever                                    | X | X | X | X |   | X |
| familial dysautonomia                                           | X | X | X | X | X | X |
| fragile X syndrome                                              | X | X | X | X | X | X |
| galactokinase deficiency                                        | X | X | X | X | X | X |
| galactosemia                                                    | X | X | X | X | X | X |
| gamma-sarcoglycanopathy                                         | X | X | X | X | X | X |
| glutaric acidemia type 1                                        | X | X | X | X | X | X |
| glycogen storage disease type III                               | X | X | X | X | X | X |
| glycogen storage disease type Ia                                | X | X | X | X | X | X |
| glycogen storage disease type Ib                                | X | X | X | X | X | X |
| hereditary fructose intolerance                                 | X | X | X | X | X | X |
| hexosaminidase A deficiency                                     | X | X | X | X | X | X |
| holocarboxylase synthetase deficiency                           | X | X | X | X | X | X |
| homocystinuria caused by cystathionine beta-synthase deficiency | X | X | X | X | X | X |
| hydrolethrus syndrome                                           | X | X | X | X | X | X |
| hypophosphatasia, autosomal recessive                           | X | X | X | X | X | X |
| inclusion body myopathy 2                                       | X | X | X | X | X | X |
| isovaleric acidemia                                             | X | X | X | X | X | X |
| lipoamide dehydrogenase deficiency                              | X | X | X | X | X | X |
| lipoid congenital adrenal hyperplasia                           | X | X | X | X | X | X |
| lysosomal acid lipase deficiency                                | X | X | X | X |   | X |
| maple syrup urine disease type 1B                               | X | X | X | X | X | X |
| maple syrup urine disease type II                               | X | X | X | X | X | X |
| maple syrup urine disease type Ia                               | X | X | X | X | X | X |
| medium chain acyl-CoA dehydrogenase deficiency                  | X | X | X | X | X | X |
| megalencephalic leukoencephalopathy with subcortical cysts      | X | X | X | X | X | X |
| metachromatic leukodystrophy                                    | X | X | X | X | X | X |
| methylmalonic acidemia, cblA type                               | X | X | X | X | X | X |
| methylmalonic acidemia, cblB type                               | X | X | X | X | X | X |
| methylmalonic aciduria and homocystinuria, cblC type            | X | X | X | X | X | X |
| mucopolidosis III gamma                                         | X | X | X | X | X | X |
| mucopolidosis IV                                                | X | X | X | X | X | X |
| mucopolysaccharidosis type I                                    | X | X | X | X | X | X |
| mucopolysaccharidosis type II                                   | X | X | X | X | X | X |
| mucopolysaccharidosis type IIIA                                 | X | X | X | X | X | X |
| mucopolysaccharidosis type IIIB                                 | X | X | X | X | X | X |
| mucopolysaccharidosis type IIIC                                 | X | X | X | X | X | X |
| muscle-eye-brain disease                                        | X | X | X | X | X | X |
| nephrotic syndrome, NPHS2-related                               | X | X | X | X | X | X |
| ornithine transcarbamylase deficiency                           | X | X | X | X | X | X |
| peroxisome biogenesis disorder type 3                           | X | X | X | X | X | X |
| peroxisome biogenesis disorder type 4                           | X | X | X | X | X | X |
| peroxisome biogenesis disorder type 5                           | X | X | X | X | X | X |
| peroxisome biogenesis disorder type 6                           | X | X | X | X | X | X |
| phenylalanine hydroxylase deficiency                            | X | X | X | X | X | X |
| polyglandular autoimmune syndrome type 1                        | X | X | X | X | X | X |
| primary carnitine deficiency                                    | X | X | X | X | X | X |
| primary hyperoxaluria type 1                                    | X | X | X | X | X | X |
| primary hyperoxaluria type 2                                    | X | X | X | X | X | X |
| primary hyperoxaluria type 3                                    | X | X | X | X | X | X |
| pycnodysostosis                                                 | X | X | X | X | X | X |
| pyruvate carboxylase deficiency                                 | X | X | X | X | X | X |

Table S2: Six ACOG criteria classification of a 176-condition panel

|                                                   |   |   |   |   |   |   |
|---------------------------------------------------|---|---|---|---|---|---|
| rhizomelic chondrodysplasia punctata type 1       | X | X | X | X | X | X |
| short chain acyl-CoA dehydrogenase deficiency     | X |   | X |   |   | X |
| spastic paraplegia type 15                        | X | X | X | X | X | X |
| spinal muscular atrophy                           | X | X | X | X | X | X |
| spondylothoracic dysostosis                       | X | X | X | X | X | X |
| sulfate transporter-related osteochondrodysplasia | X | X | X | X | X | X |
| tyrosinemia type I                                | X | X | X | X | X | X |
| tyrosinemia type II                               | X | X | X | X | X | X |
| very long chain acyl-CoA dehydrogenase deficiency | X | X | X | X | X | X |
| xeroderma pigmentosum group A                     | X | X | X | X | X | X |
| xeroderma pigmentosum group C                     | X | X | X | X | X | X |
