# Supplementary material for: A data-driven evaluation of the size and content of expanded carrier screening panels
Source: Genet Med. 2019 Feb 28;21(9):1931–9. doi: 10.1038/s41436-019-0466-5 (PMC6752311; doi:10.1038/s41436-019-0466-5)
Supplement: Supplementary file 4 — Supplementary TableS3 [file 41436_2019_466_MOESM4_ESM.pdf]

**Table S3: 1-in-100 carrier frequency criteria classifications of 176-condition panel**

| Disease name                                                 | Any ethnicity<br>(relaxed X-linked<br>criteria)* | All ethnicities<br>(relaxed X-linked<br>criteria)* | U.S.-population<br>(relaxed X-linked<br>criteria)* | Any ethnicity<br>(stringent X-linked<br>criteria)*<br>in at least one ethnicity | All ethnicities<br>(stringent X-linked<br>criteria)* | U.S.-population<br>(stringent X-linked<br>criteria)* |
|--------------------------------------------------------------|--------------------------------------------------|----------------------------------------------------|----------------------------------------------------|---------------------------------------------------------------------------------|------------------------------------------------------|------------------------------------------------------|
| 11-beta-hydroxylase-deficient congenital adrenal hyperplasia |                                                  |                                                    |                                                    |                                                                                 |                                                      |                                                      |
| congenital adrenal hyperplasia                               | X                                                | X                                                  | X                                                  | X                                                                               | X                                                    | X                                                    |
| 6-pyruvoyl-tetrahydropterin synthase deficiency              |                                                  |                                                    |                                                    |                                                                                 |                                                      |                                                      |
| ABCC8-related hyperinsulinism                                |                                                  |                                                    |                                                    |                                                                                 |                                                      |                                                      |
| AMT-related glycine encephalopathy                           |                                                  |                                                    |                                                    |                                                                                 |                                                      |                                                      |
| ARSACS                                                       |                                                  |                                                    |                                                    |                                                                                 |                                                      |                                                      |
| ATP7A-related disorders                                      | X                                                | X                                                  |                                                    |                                                                                 |                                                      |                                                      |
| Alstrom syndrome                                             |                                                  |                                                    |                                                    |                                                                                 |                                                      |                                                      |
| Andermann syndrome                                           |                                                  |                                                    |                                                    |                                                                                 |                                                      |                                                      |
| Bardet-Biedl syndrome, BBS1-related                          |                                                  |                                                    |                                                    |                                                                                 |                                                      |                                                      |
| Bardet-Biedl syndrome, BBS10-related                         |                                                  |                                                    |                                                    |                                                                                 |                                                      |                                                      |
| Bardet-Biedl syndrome, BBS12-related                         |                                                  |                                                    |                                                    |                                                                                 |                                                      |                                                      |
| Bardet-Biedl syndrome, BBS2-related                          |                                                  |                                                    |                                                    |                                                                                 |                                                      |                                                      |
| Bloom syndrome                                               |                                                  |                                                    |                                                    |                                                                                 |                                                      |                                                      |
| CLN3-related neuronal ceroid lipofuscinosis                  |                                                  |                                                    |                                                    |                                                                                 |                                                      |                                                      |
| CLN5-related neuronal ceroid lipofuscinosis                  |                                                  |                                                    |                                                    |                                                                                 |                                                      |                                                      |
| CLN6-related neuronal ceroid lipofuscinosis                  |                                                  |                                                    |                                                    |                                                                                 |                                                      |                                                      |
| COL4A3-related Alport syndrome                               |                                                  |                                                    |                                                    |                                                                                 |                                                      |                                                      |
| COL4A4-related Alport syndrome                               |                                                  |                                                    |                                                    |                                                                                 |                                                      |                                                      |
| Canavan disease                                              | X                                                |                                                    |                                                    | X                                                                               |                                                      |                                                      |
| Cohen syndrome                                               |                                                  |                                                    |                                                    |                                                                                 |                                                      |                                                      |
| Costeff optic atrophy syndrome                               |                                                  |                                                    |                                                    |                                                                                 |                                                      |                                                      |
| D-bifunctional protein deficiency                            |                                                  |                                                    |                                                    |                                                                                 |                                                      |                                                      |
| ERCC6-related disorders                                      |                                                  |                                                    |                                                    |                                                                                 |                                                      |                                                      |
| ERCC8-related disorders                                      |                                                  |                                                    |                                                    |                                                                                 |                                                      |                                                      |
| EVC-related Ellis-van Creveld syndrome                       |                                                  |                                                    |                                                    |                                                                                 |                                                      |                                                      |
| EVC2-related Ellis-van Creveld syndrome                      |                                                  |                                                    |                                                    |                                                                                 |                                                      |                                                      |
| FKRP-related disorders                                       |                                                  |                                                    |                                                    |                                                                                 |                                                      |                                                      |
| FKTN-related disorders                                       | X                                                |                                                    |                                                    | X                                                                               |                                                      |                                                      |
| Fabry disease                                                | X                                                | X                                                  | X                                                  |                                                                                 |                                                      |                                                      |
| Fanconi anemia complementation group A                       |                                                  |                                                    |                                                    |                                                                                 |                                                      |                                                      |
| Fanconi anemia type C                                        |                                                  |                                                    |                                                    |                                                                                 |                                                      |                                                      |
| GJB2-related DFNB1 nonsyndromic hearing loss and deafness    | X                                                |                                                    | X                                                  | X                                                                               |                                                      | X                                                    |
| GLB1-related disorders                                       |                                                  |                                                    |                                                    |                                                                                 |                                                      |                                                      |
| GLDC-related glycine encephalopathy                          |                                                  |                                                    |                                                    |                                                                                 |                                                      |                                                      |
| GNPTAB-related disorders                                     |                                                  |                                                    |                                                    |                                                                                 |                                                      |                                                      |
| GRACILE syndrome                                             |                                                  |                                                    |                                                    |                                                                                 |                                                      |                                                      |
| Gaucher disease                                              | X                                                |                                                    |                                                    | X                                                                               |                                                      |                                                      |
| HADHA-related disorders                                      |                                                  |                                                    |                                                    |                                                                                 |                                                      |                                                      |
| HMG-CoA lyase deficiency                                     |                                                  |                                                    |                                                    |                                                                                 |                                                      |                                                      |
| Hb beta chain-related hemoglobinopathy                       | X                                                |                                                    | X                                                  | X                                                                               |                                                      | X                                                    |
| Herlitz junctional epidermolysis bullosa, LAMA3-related      |                                                  |                                                    |                                                    |                                                                                 |                                                      |                                                      |
| Herlitz junctional epidermolysis bullosa, LAMB3-related      |                                                  |                                                    |                                                    |                                                                                 |                                                      |                                                      |
| Herlitz junctional epidermolysis bullosa, LAMC2-related      |                                                  |                                                    |                                                    |                                                                                 |                                                      |                                                      |
| Joubert syndrome 2                                           |                                                  |                                                    |                                                    |                                                                                 |                                                      |                                                      |
| KCNJ11-related familial hyperinsulinism                      |                                                  |                                                    |                                                    |                                                                                 |                                                      |                                                      |
| Krabbe disease                                               | X                                                |                                                    |                                                    | X                                                                               |                                                      |                                                      |
| LAMA2-related muscular dystrophy                             |                                                  |                                                    |                                                    |                                                                                 |                                                      |                                                      |
| Leigh syndrome, French-Canadian type                         |                                                  |                                                    |                                                    |                                                                                 |                                                      |                                                      |
| MKS1-related disorders                                       |                                                  |                                                    |                                                    |                                                                                 |                                                      |                                                      |
| MUT-related methylmalonic acidemia                           |                                                  |                                                    |                                                    |                                                                                 |                                                      |                                                      |
| MYO7A-related disorders                                      |                                                  |                                                    |                                                    |                                                                                 |                                                      |                                                      |
| NEB-related nemaline myopathy                                | X                                                |                                                    |                                                    | X                                                                               |                                                      |                                                      |
| Niemann-Pick disease type C                                  |                                                  |                                                    |                                                    |                                                                                 |                                                      |                                                      |
| Niemann-Pick disease type C2                                 |                                                  |                                                    |                                                    |                                                                                 |                                                      |                                                      |
| Niemann-Pick disease, SMPD1-associated                       |                                                  |                                                    |                                                    |                                                                                 |                                                      |                                                      |
| Nijmegen breakage syndrome                                   |                                                  |                                                    |                                                    |                                                                                 |                                                      |                                                      |
| Northern epilepsy                                            |                                                  |                                                    |                                                    |                                                                                 |                                                      |                                                      |
| PCCA-related propionic acidemia                              |                                                  |                                                    |                                                    |                                                                                 |                                                      |                                                      |
| PCCB-related propionic acidemia                              |                                                  |                                                    |                                                    |                                                                                 |                                                      |                                                      |
| PCDH15-related disorders                                     |                                                  |                                                    |                                                    |                                                                                 |                                                      |                                                      |
| PEX1-related Zellweger syndrome spectrum                     |                                                  |                                                    |                                                    |                                                                                 |                                                      |                                                      |
| PKHD1-related autosomal recessive polycystic kidney disease  | X                                                |                                                    |                                                    | X                                                                               |                                                      |                                                      |
| PPT1-related neuronal ceroid lipofuscinosis                  |                                                  |                                                    |                                                    |                                                                                 |                                                      |                                                      |
| PROP1-related combined pituitary hormone deficiency          |                                                  |                                                    |                                                    |                                                                                 |                                                      |                                                      |
| Pendred syndrome                                             | X                                                |                                                    |                                                    | X                                                                               |                                                      |                                                      |
| Pompe disease                                                | X                                                |                                                    | X                                                  | X                                                                               |                                                      | X                                                    |
| RTEL1-related disorders                                      |                                                  |                                                    |                                                    |                                                                                 |                                                      |                                                      |
| Salla disease                                                |                                                  |                                                    |                                                    |                                                                                 |                                                      |                                                      |
| Sandhoff disease                                             |                                                  |                                                    |                                                    |                                                                                 |                                                      |                                                      |
| Segawa syndrome                                              |                                                  |                                                    |                                                    |                                                                                 |                                                      |                                                      |
| Sjogren-Larsson syndrome                                     |                                                  |                                                    |                                                    |                                                                                 |                                                      |                                                      |
| Smith-Lemli-Opitz syndrome                                   | X                                                |                                                    | X                                                  | X                                                                               |                                                      | X                                                    |
| TGM1-related autosomal recessive congenital ichthyosis       |                                                  |                                                    |                                                    |                                                                                 |                                                      |                                                      |
| TPP1-related neuronal ceroid lipofuscinosis                  |                                                  |                                                    |                                                    |                                                                                 |                                                      |                                                      |
| USH1C-related disorders                                      |                                                  |                                                    |                                                    |                                                                                 |                                                      |                                                      |
| USH2A-related disorders                                      | X                                                |                                                    | X                                                  | X                                                                               |                                                      | X                                                    |
| Usher syndrome type 3                                        |                                                  |                                                    |                                                    |                                                                                 |                                                      |                                                      |
| Wilson disease                                               | X                                                |                                                    |                                                    | X                                                                               |                                                      |                                                      |
| X-linked Alport syndrome                                     | X                                                | X                                                  | X                                                  |                                                                                 |                                                      |                                                      |
| X-linked adrenoleukodystrophy                                | X                                                | X                                                  |                                                    |                                                                                 |                                                      |                                                      |
| X-linked congenital adrenal hypoplasia                       | X                                                | X                                                  |                                                    |                                                                                 |                                                      |                                                      |
| X-linked juvenile retinoschisis                              | X                                                |                                                    | X                                                  |                                                                                 |                                                      |                                                      |
| X-linked myotubular myopathy                                 | X                                                | X                                                  |                                                    |                                                                                 |                                                      |                                                      |
| X-linked severe combined immunodeficiency                    |                                                  |                                                    |                                                    |                                                                                 |                                                      |                                                      |
| adenosine deaminase deficiency                               |                                                  |                                                    |                                                    |                                                                                 |                                                      |                                                      |
| alpha thalassemia                                            | X                                                | X                                                  | X                                                  | X                                                                               | X                                                    | X                                                    |
| alpha-mannosidosis                                           |                                                  |                                                    |                                                    |                                                                                 |                                                      |                                                      |

\*Relaxed X-linked criteria: 1-in-10,000 carrier rate threshold for X-linked conditions

Stringent X-linked criteria: 1-in-100 carrier rate threshold for X-linked conditions

**Table S3: 1-in-100 carrier frequency criteria classifications of 176-condition panel**

|                                                                 |  |   |   |   |   |   |
|-----------------------------------------------------------------|--|---|---|---|---|---|
| alpha-sarcoglycanopathy                                         |  |   |   |   |   |   |
| argininemia                                                     |  |   |   |   |   |   |
| argininosuccinic aciduria                                       |  |   |   |   |   |   |
| aspartylglycosaminuria                                          |  |   |   |   |   |   |
| ataxia with vitamin E deficiency                                |  |   |   |   |   |   |
| ataxia-telangiectasia                                           |  |   |   |   |   |   |
| autosomal recessive osteopetrosis type 1                        |  |   |   |   |   |   |
| beta-sarcoglycanopathy                                          |  |   |   |   |   |   |
| biotinidase deficiency                                          |  |   |   |   |   |   |
| calpainopathy                                                   |  |   |   |   |   |   |
| carbamoylphosphate synthetase I deficiency                      |  |   |   |   |   |   |
| carnitine palmitoyltransferase IA deficiency                    |  |   |   |   |   |   |
| carnitine palmitoyltransferase II deficiency                    |  | X |   |   | X |   |
| cartilage-hair hypoplasia                                       |  |   |   |   |   |   |
| cerebrotendinous xanthomatosis                                  |  |   |   |   |   |   |
| citrullinemia type 1                                            |  |   |   |   |   |   |
| congenital Finnish nephrosis                                    |  |   |   |   |   |   |
| congenital disorder of glycosylation type Ia                    |  | X |   | X | X | X |
| congenital disorder of glycosylation type Ib                    |  |   |   |   |   |   |
| congenital disorder of glycosylation type Ic                    |  |   |   |   |   |   |
| cystic fibrosis                                                 |  | X |   | X | X | X |
| cystinosis                                                      |  |   |   |   |   |   |
| delta-sarcoglycanopathy                                         |  |   |   |   |   |   |
| dysferlinopathy                                                 |  |   |   |   |   |   |
| dystrophinopathy (including Duchenne/Becker muscular dystrophy) |  | X | X | X |   |   |
| familial Mediterranean fever                                    |  | X |   | X | X | X |
| familial dysautonomia                                           |  | X |   |   | X |   |
| fragile X syndrome                                              |  | X | X | X |   |   |
| galactokinase deficiency                                        |  |   |   |   |   |   |
| galactosemia                                                    |  |   |   |   |   |   |
| gamma-sarcoglycanopathy                                         |  |   |   |   |   |   |
| glutaric acidemia type 1                                        |  |   |   |   |   |   |
| glycogen storage disease type III                               |  |   |   |   |   |   |
| glycogen storage disease type Ia                                |  |   |   |   |   |   |
| glycogen storage disease type Ib                                |  |   |   |   |   |   |
| hereditary fructose intolerance                                 |  | X |   |   | X |   |
| hexosaminidase A deficiency                                     |  | X |   |   | X |   |
| holocarboxylase synthetase deficiency                           |  |   |   |   |   |   |
| homocystinuria caused by cystathionine beta-synthase deficiency |  |   |   |   |   |   |
| hydrolethals syndrome                                           |  |   |   |   |   |   |
| hypophosphatasia, autosomal recessive                           |  |   |   |   |   |   |
| inclusion body myopathy 2                                       |  |   |   |   |   |   |
| isovaleric acidemia                                             |  |   |   |   |   |   |
| lipoamide dehydrogenase deficiency                              |  | X |   |   | X |   |
| lipoid congenital adrenal hyperplasia                           |  |   |   |   |   |   |
| lysosomal acid lipase deficiency                                |  |   |   |   |   |   |
| maple syrup urine disease type 1B                               |  |   |   |   |   |   |
| maple syrup urine disease type II                               |  |   |   |   |   |   |
| maple syrup urine disease type Ia                               |  |   |   |   |   |   |
| medium chain acyl-CoA dehydrogenase deficiency                  |  | X |   | X | X | X |
| megalencephalic leukoencephalopathy with subcortical cysts      |  |   |   |   |   |   |
| metachromatic leukodystrophy                                    |  |   |   |   |   |   |
| methylmalonic acidemia, cblA type                               |  |   |   |   |   |   |
| methylmalonic acidemia, cblB type                               |  |   |   |   |   |   |
| methylmalonic aciduria and homocystinuria, cblC type            |  |   |   |   |   |   |
| mucopolipidosis III gamma                                       |  |   |   |   |   |   |
| mucopolipidosis IV                                              |  |   |   |   |   |   |
| mucopolysaccharidosis type I                                    |  |   |   |   |   |   |
| mucopolysaccharidosis type II                                   |  | X | X |   |   |   |
| mucopolysaccharidosis type IIIA                                 |  |   |   |   |   |   |
| mucopolysaccharidosis type IIIB                                 |  |   |   |   |   |   |
| mucopolysaccharidosis type IIIC                                 |  |   |   |   |   |   |
| muscle-eye-brain disease                                        |  |   |   |   |   |   |
| nephrotic syndrome, NPHS2-related                               |  |   |   |   |   |   |
| ornithine transcarbamylase deficiency                           |  | X | X |   |   |   |
| peroxisome biogenesis disorder type 3                           |  |   |   |   |   |   |
| peroxisome biogenesis disorder type 4                           |  |   |   |   |   |   |
| peroxisome biogenesis disorder type 5                           |  |   |   |   |   |   |
| peroxisome biogenesis disorder type 6                           |  |   |   |   |   |   |
| phenylalanine hydroxylase deficiency                            |  | X |   | X | X | X |
| polyglandular autoimmune syndrome type 1                        |  |   |   |   |   |   |
| primary carnitine deficiency                                    |  | X |   |   | X |   |
| primary hyperoxaluria type 1                                    |  |   |   |   |   |   |
| primary hyperoxaluria type 2                                    |  |   |   |   |   |   |
| primary hyperoxaluria type 3                                    |  | X |   |   | X |   |
| pycnodysostosis                                                 |  |   |   |   |   |   |
| pyruvate carboxylase deficiency                                 |  |   |   |   |   |   |
| rhizomelic chondrodysplasia punctata type 1                     |  |   |   |   |   |   |
| short chain acyl-CoA dehydrogenase deficiency                   |  | X |   |   | X |   |
| spastic paraplegia type 15                                      |  |   |   |   |   |   |
| spinal muscular atrophy                                         |  | X | X | X | X | X |
| spondylothoracic dysostosis                                     |  |   |   |   |   |   |
| sulfate transporter-related osteochondrodysplasia               |  |   |   |   |   |   |
| tyrosinemia type I                                              |  |   |   |   |   |   |
| tyrosinemia type II                                             |  |   |   |   |   |   |
| very long chain acyl-CoA dehydrogenase deficiency               |  |   |   |   |   |   |
| xeroderma pigmentosum group A                                   |  |   |   |   |   |   |
| xeroderma pigmentosum group C                                   |  |   |   |   |   |   |

\*Relaxed X-linked criteria: 1-in-10,000 carrier rate threshold for X-linked conditions

Stringent X-linked criteria: 1-in-100 carrier rate threshold for X-linked conditions
